# Supplementary figures and images for: Dysfunction of Chloroplast Protease Activity Mitigates pgr5 Phenotype in the Green Algae Chlamydomonas reinhardtii
Source: MDPI journal article supplement (doi:10.3390/plants13050606), 2024-02-23

# Figure S1

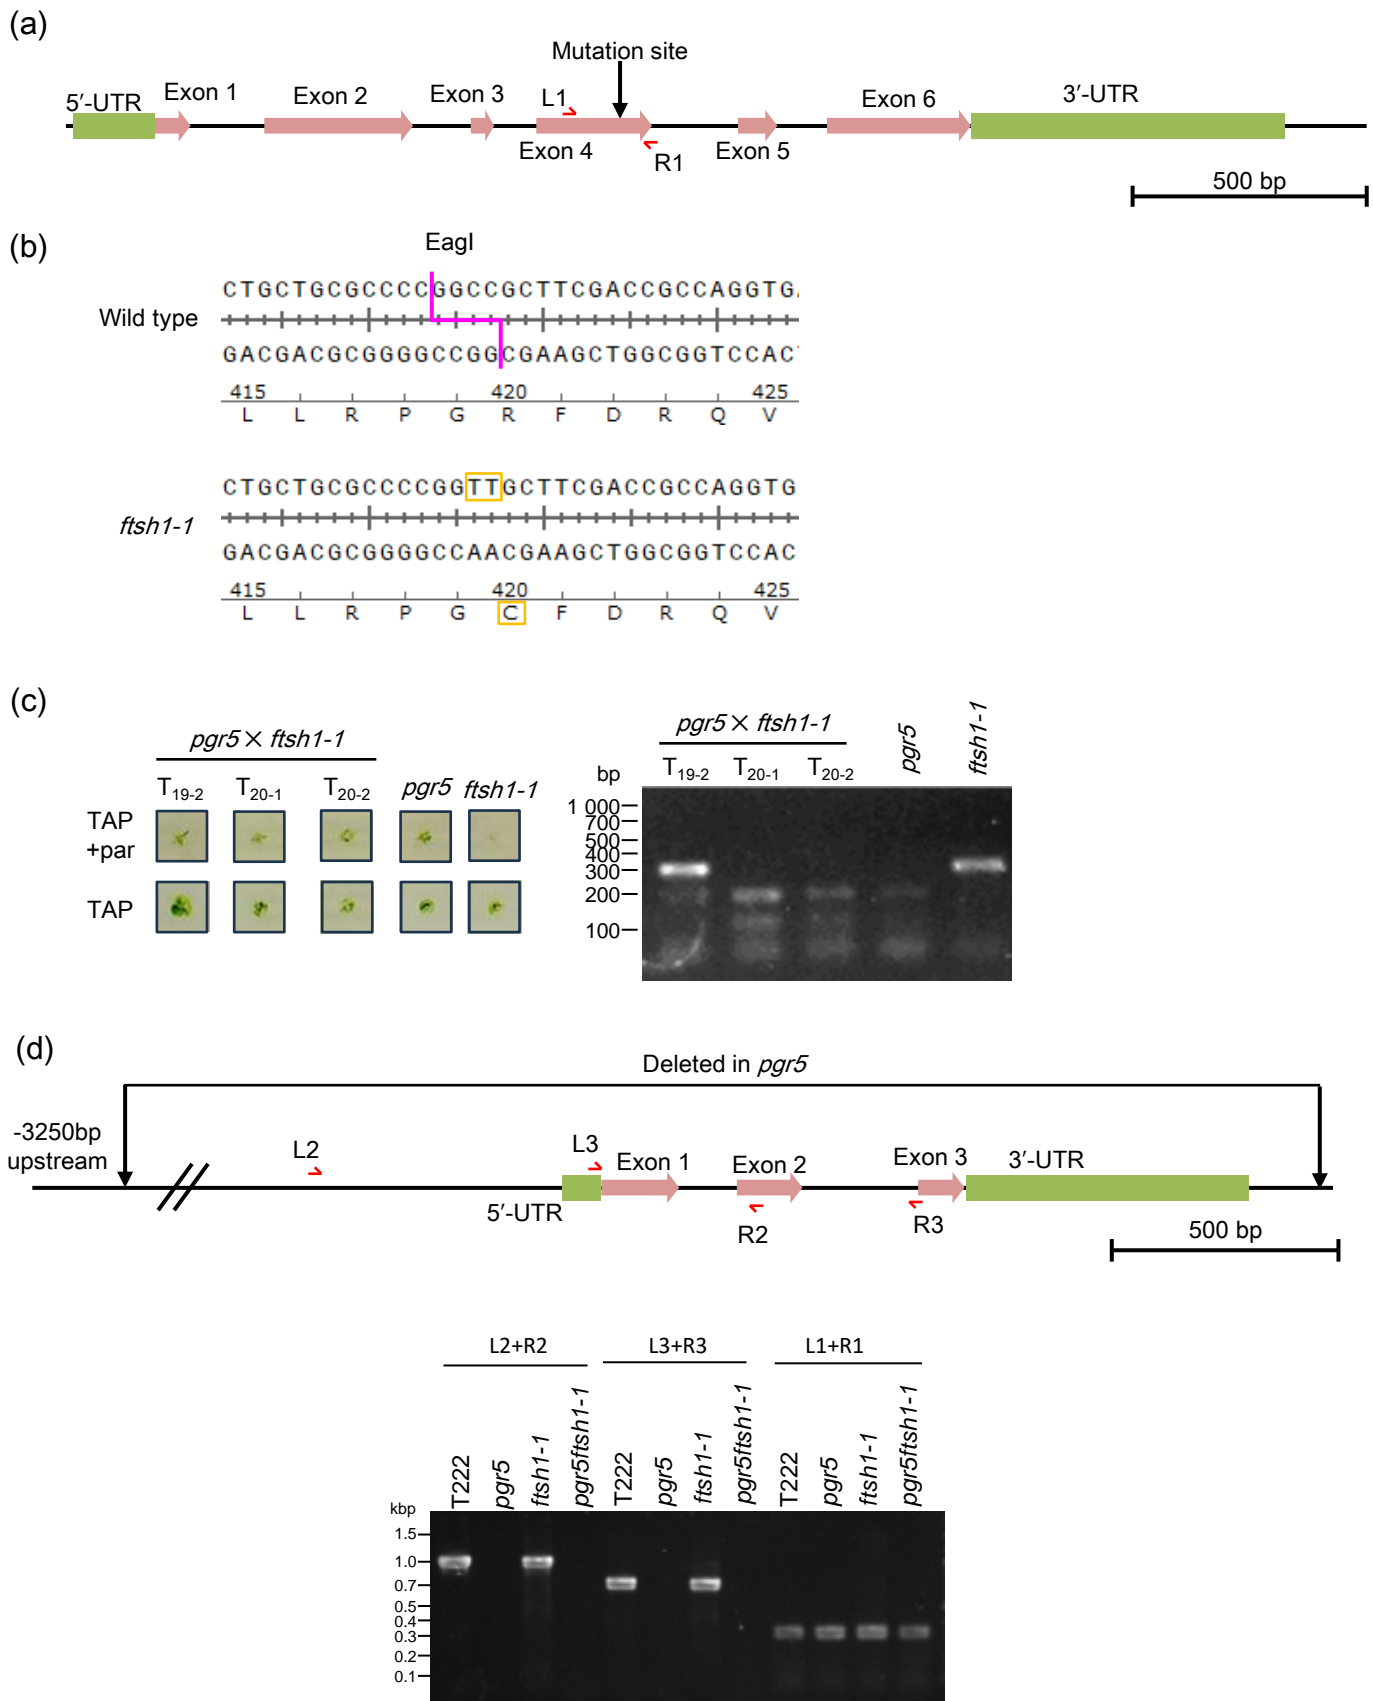

**Figure S2**

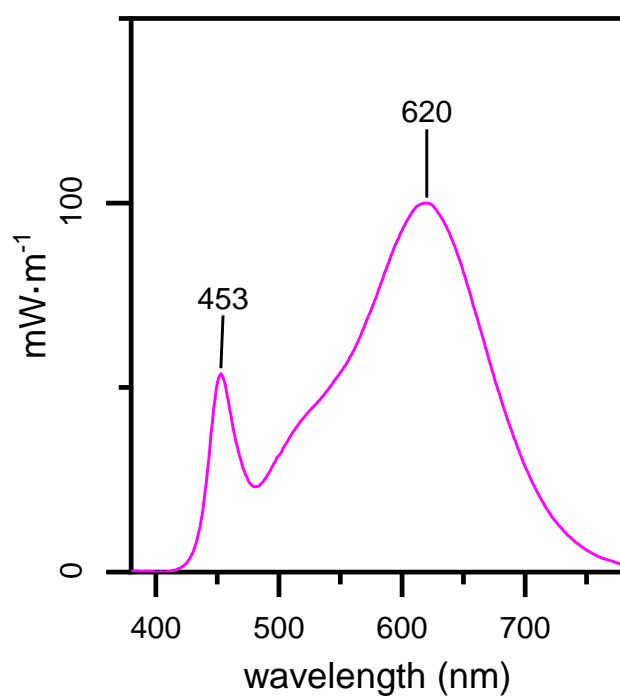

# Figure S3

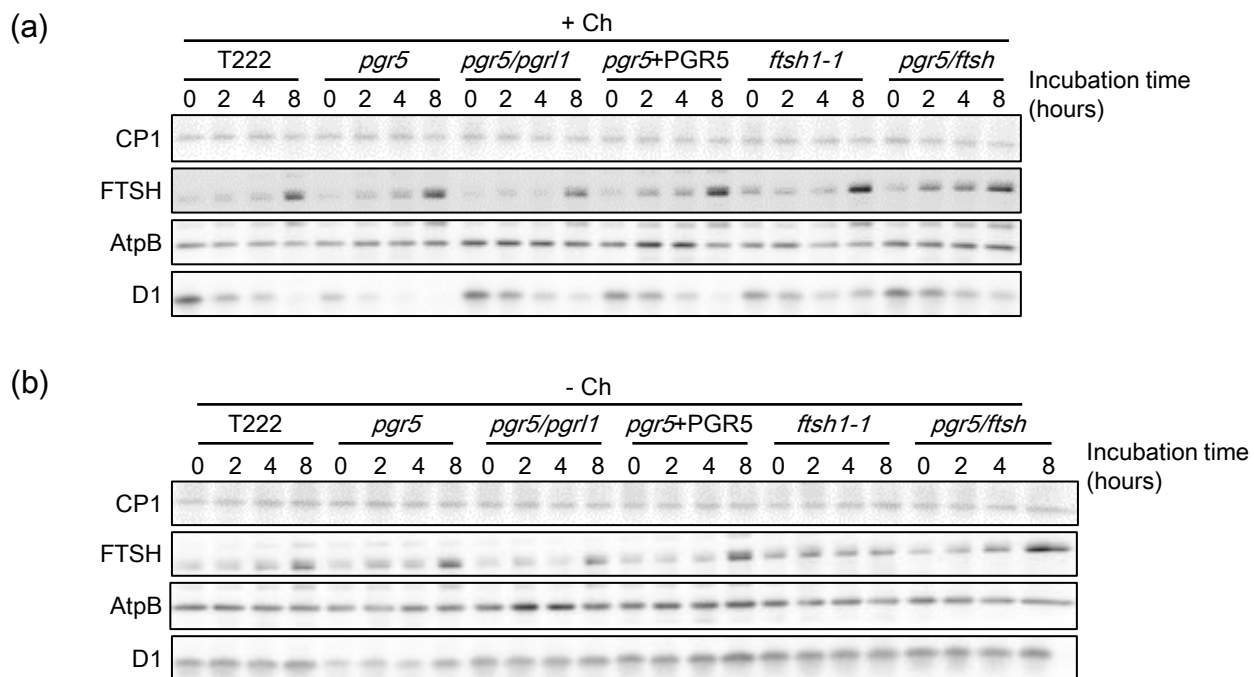

Supplement: s1 [file s1]
